# Supplementary material for: A phosphorylated zinc finger peptide bearing a gadolinium complex for zinc detection by MRI
Source: Royal Society of Chemistry journal article supplement (doi:10.1039/d3dt00728f), 2023-01-01
Supplement: d3dt00728f1.pdf [file d3dt00728f1.pdf]

## A phosphorylated zinc finger peptide bearing a Gadolinium complex for zinc detection by MRI

Kyangwi P. Malikidogo,<sup>a</sup> Agnès Pallier,<sup>b</sup> Frédéric Szeremeta,<sup>b</sup> Célia S. Bonnet<sup>\*b</sup> and Olivier Sénèque<sup>\*a</sup>

<sup>a</sup> Univ. Grenoble Alpes, CNRS, CEA, IRIG, LCBM (UMR 5249), F-38000 Grenoble

<sup>b</sup> Centre de Biophysique Moléculaire, CNRS (UPR 4301), Université d'Orléans, F-45041 Orléans, France.

## Electronic Supporting Information

### Content

|                                                                                                     |   |
|-----------------------------------------------------------------------------------------------------|---|
| Abbreviations                                                                                       | 2 |
| Chemical structure of LZF2 <sup>Ln</sup>                                                            | 2 |
| HPLC chromatogram and ESI-MS spectra                                                                | 3 |
| Evolution of tryptophan fluorescence emission of both ZFQE <sup>Tb</sup> and ZFQD <sup>Tb</sup>     | 3 |
| Absorption, Tb <sup>3+</sup> excitation and Tb <sup>3+</sup> emission spectra of ZFQE <sup>Tb</sup> | 4 |
| Determination luminescence decay times in D <sub>2</sub> O                                          | 4 |
| Selectivity of Zn <sup>2+</sup> vs Cu <sup>2+</sup>                                                 | 5 |
| Best-fit parameters obtained from the fitting of the <sup>1</sup> H NMRD profiles to the SBM theory | 5 |
| T <sub>1</sub> relaxation time constants of the phantoms                                            | 6 |
| Equations used for the analysis of the NMRD data                                                    | 6 |
| References                                                                                          | 8 |

## Abbreviations

**Boc:** *tert*-butyloxycarbonyl; **CD:** circular dichroism; **DCM:** dichloromethane; **DIEA:** *N,N*-diisopropylethylamine; **DMF:** *N,N*-dimethylformamide; **ESI:** electrospray ionization; **Et<sub>2</sub>O:** diethylether; **Fmoc:** 9-fluorenylmethoxycarbonyl; **HCTU:** 2-(6-chloro-1-*H*-benzotriazole-1-yl)-1,1,3,3-tetramethylaminium hexafluoro-phosphate; **HEPES:** hydroxyethyl-piperazineethane-sulfonic acid; **HPLC:** high performance liquid chromatography; **MeCN:** acetonitrile; **LRMS:** low resolution mass spectrometry; **NMRD:** Nuclear Magnetic Relaxation Dispersion; **Pd(PPh<sub>3</sub>)<sub>4</sub>:** *tetrakis*(triphenylphosphine)-palladium(0); **PyBOP:** (benzotriazol-1-yloxy)tripyrrolidino-phosphonium hexafluorophosphate; **SBM:** Solomon-Bloembergen-Morgan; **tBu:** *tert*-butyl; **TCEP:** *tris*(2-carboxyethyl)phosphine ; **TFA:** trifluoroacetic acid; **Trt:** trityl ; **UV-Vis:** ultraviolet-visible

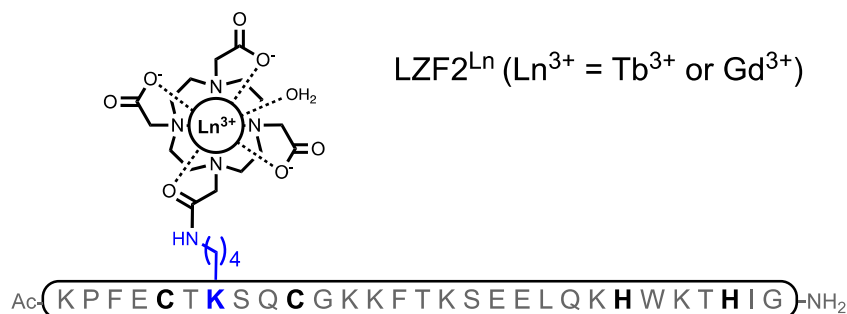

**Fig. S1:** Sequence of LZF2<sup>Ln</sup> (Ln = Tb or Gd).

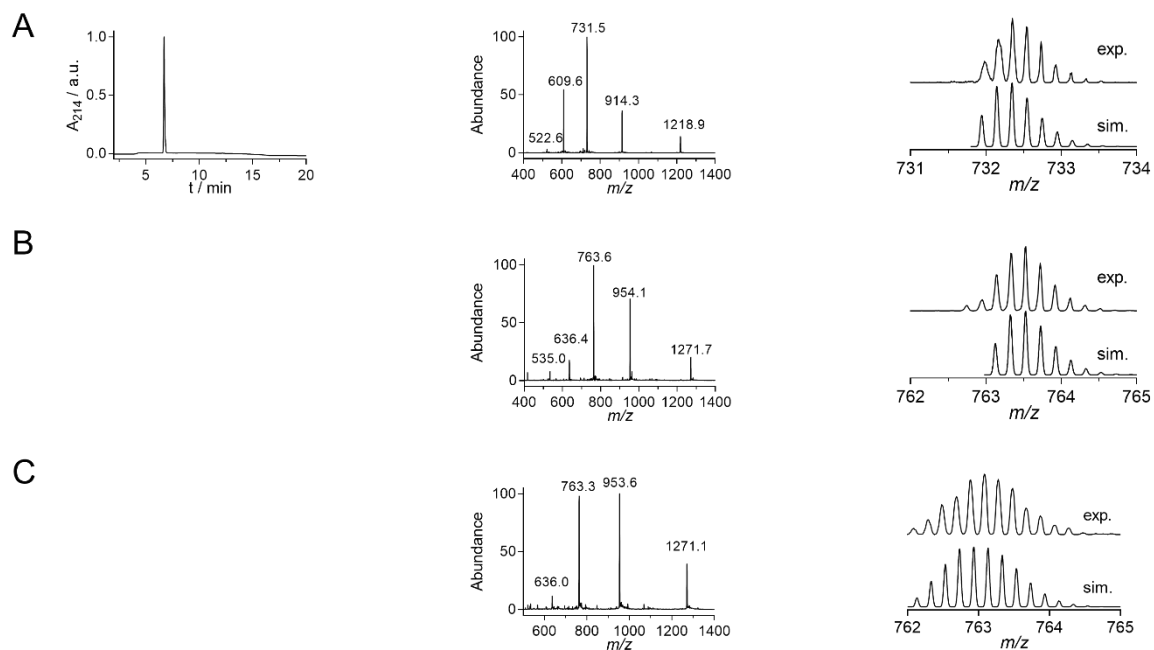

**Fig. S2:** HPLC chromatogram and ESI-MS spectra of ZFQE (A), ESI-MS spectra of ZFQE<sup>Tb</sup> (B) and ZFQE<sup>Gd</sup> (C).

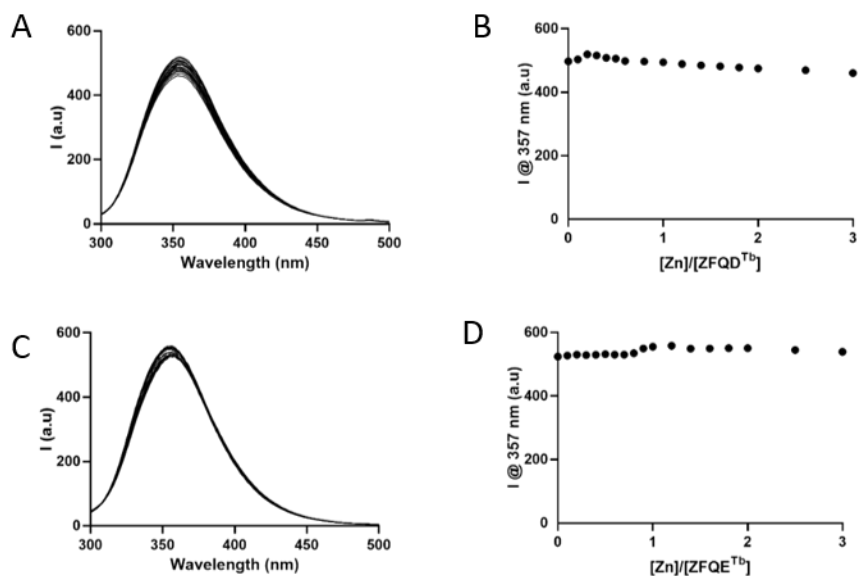

**Fig. S3:** A and B) Evolution of the tryptophan fluorescence emission ( $\lambda_{\text{ex}} = 280 \text{ nm}$ ) upon addition of  $\text{Zn}^{2+}$  in a solution of ZFQD<sup>Tb</sup> (100  $\mu\text{M}$ ). C and D) Evolution of the tryptophan fluorescence emission ( $\lambda_{\text{ex}} = 280 \text{ nm}$ ) upon  $\text{Zn}^{2+}$  addition in a solution of ZFQE<sup>Tb</sup> (20  $\mu\text{M}$ ). Samples were prepared in unbuffered water, pH adjusted to 7.4 for CD and in a HEPES buffer (10 mM, pH 7.4) containing 250  $\mu\text{M}$  TCEP for luminescence.

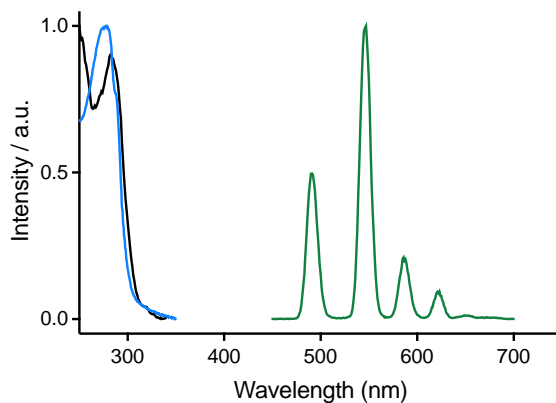

**Fig. S4:** Absorption (blue) and time-gated  $\text{Tb}^{3+}$  luminescence excitation (black,  $\lambda_{\text{em}} = 545$  nm, delay = 0.1 ms) and emission (green,  $\lambda_{\text{ex}} = 280$  nm, delay = 0.1 ms) spectra of  $\text{ZFQE}^{\text{Tb}}$  in HEPES buffer (10 mM, pH 7.4).

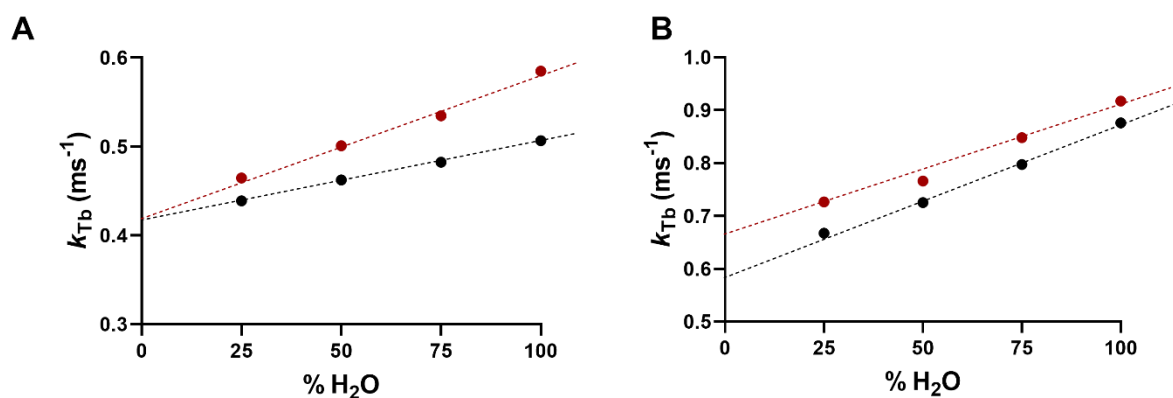

**Fig. S5:** Plot of the  $\text{Tb}^{3+}$  luminescence decay rate constants  $k_{\text{Tb}}$  against the volume fraction of  $\text{H}_2\text{O}$  in  $\text{H}_2\text{O}/\text{D}_2\text{O}$  mixtures for free (black) and Zn-loaded (red)  $\text{ZFQE}^{\text{Tb}}$  (A) and  $\text{ZFQD}^{\text{Tb}}$  (B).<sup>1</sup> Decays were recorded in a HEPES buffer (10 mM, pH 7.4) containing 250  $\mu\text{M}$  TCEP.

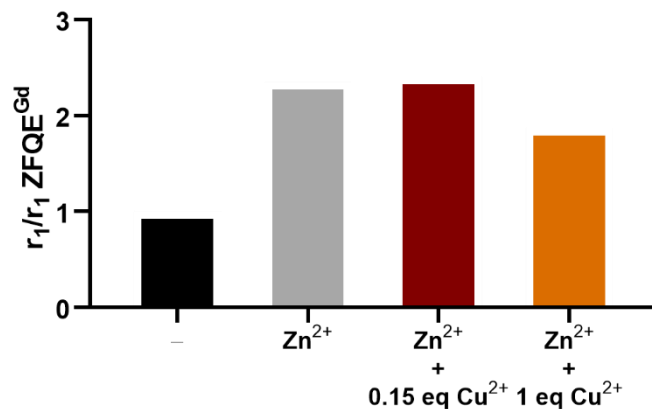

**Fig. S6:** Selectivity plot obtained by measuring the relaxivity of ZFQE<sup>Gd</sup> (0.38 mM) alone (left) or in the presence of 1 eq. of Zn<sup>2+</sup>, to which 0.15 eq. or 1 eq. of Cu<sup>2+</sup> have been added. All solutions were prepared in HEPES buffer solution (100 mM, pH 7.4, 25 mM TCEP).

**Table S1.** Best-fit parameters obtained from the fitting of the <sup>1</sup>H NMRD profiles to the SBM theory.

| Parameters                                    | ZFQE <sup>Gd</sup> |
|-----------------------------------------------|--------------------|
| $q^a$                                         | 1                  |
| $k_{\text{ex}}^{298} (10^6 \text{ s}^{-1})^a$ | 111                |
| $\Delta H^\ddagger (\text{kJ mol}^{-1})^a$    | 21                 |
| $E_{\text{R}} (\text{kJ mol}^{-1})$           | $22 \pm 4$         |
| $\tau_{\text{R}}^{298} (\text{ps})$           | $990 \pm 50$       |
| $E_{\text{V}} (\text{kJ mol}^{-1})^a$         | 1                  |
| $\tau_{\text{V}}^{298} (\text{ps})$           | $13 \pm 3$         |
| $\Delta^2 (10^{19} \text{ s}^{-2})$           | $0.09 \pm 0.01$    |

<sup>a</sup> Fixed during the fitting procedure.

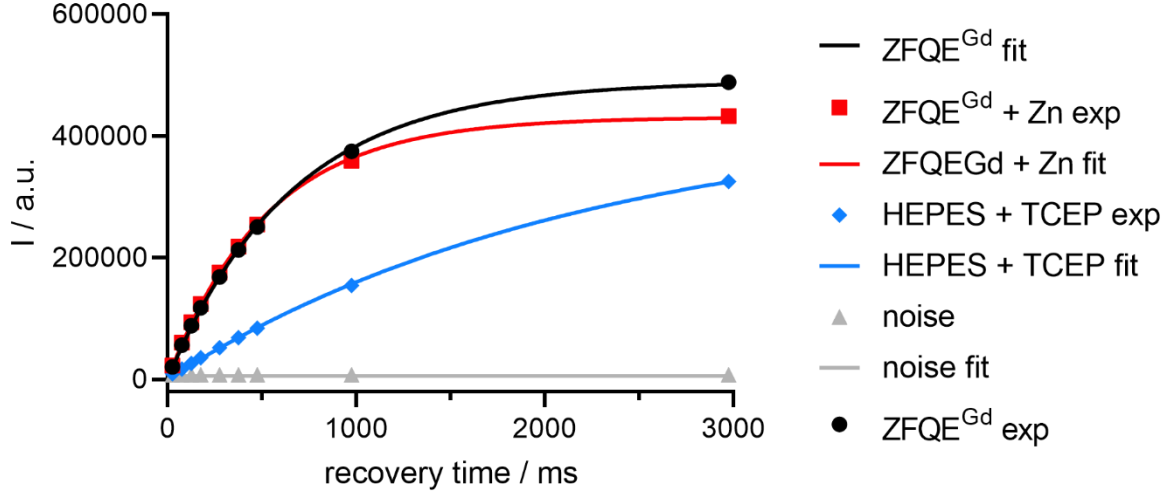

**Fig. S7.** Mean intensity of phantoms of ZFQE<sup>Gd</sup> (●), Zn-ZFQE<sup>Gd</sup> (■) and HEPES (◆), and of background noise (▲) measured on MRI images acquired at a fixed TE value of 9.9 ms, with 9 different TR values ranging from 25 ms to 3000 ms. Images were acquired with a spin echo sequence at 9.4 T, with a BioSpec 94/20 Bruker spectrometer. An exponential fitting of these curves allows measurement of the T1 relaxation time constants of the phantoms.

### Equations used for the analysis of the NMRD data

The measured longitudinal proton relaxation rate,  $R_1^{obs}$  is the sum of the paramagnetic and diamagnetic contributions as expressed in Eq. 1, where  $r_1$  is the proton relaxivity:

$$R_1^{obs} = R_1^d + R_1^p = R_1^d + r_1 \times c_{Gd} \quad [1]$$

The relaxivity can be divided into terms of inner and outer sphere, as follows:

$$r_1 = r_{1is} + r_{1os} \quad [2]$$

The inner sphere term is obtained in Eq. 3, where  $q$  is the number of inner sphere water molecules.<sup>2</sup>

$$r_{1is} = \frac{1}{1000} \times \frac{q}{55.55} \times \frac{1}{T_{1m}^H + \tau_m} \quad [3]$$

The longitudinal relaxation rate of inner sphere protons,  $1/T_{1m}^H$  is expressed by Eq. 4, where  $r_{GdH}$  is the effective distance between the electron charge and the <sup>1</sup>H nucleus,  $\omega_I$  is the proton resonance frequency and  $\omega_S$  is the Larmor frequency of the Gd<sup>III</sup> electron spin.

$$\frac{1}{T_{1m}^H} = \frac{2}{15} \left( \frac{\mu_0}{4\pi} \right)^2 \frac{\hbar^2 \gamma_I^2 \gamma_S^2}{r_{GdH}^6} S(S+1) \times [3J(\omega_I; \tau_{d1}) + 7J(\omega_S; \tau_{d2})] \quad [4]$$

$$\frac{1}{\tau_{di}} = \frac{1}{\tau_m} + \frac{1}{\tau} + \frac{1}{T_{ie}} \quad [5]$$

The longitudinal and transverse electronic relaxation rates,  $1/T_{1e}$  and  $1/T_{2e}$  are expressed by Eq. 6-7, where  $\tau_v$  is the electronic correlation time for the modulation of the zero-field-splitting interaction,  $E_v$  the corresponding activation energy and  $\Delta^2$  is the mean square zero-field-splitting energy. We assumed a simple exponential dependence of  $\tau_v$  versus  $1/T$ .

$$\left( \frac{1}{T_{1e}} \right)^{ZFS} = \frac{1}{25} \Delta^2 \tau_v \{4S(S+1) - 3\} \left( \frac{1}{1 + \omega_S^2 \tau_v^2} + \frac{4}{1 + 4\omega_S^2 \tau_v^2} \right) \quad [6]$$

$$\left( \frac{1}{T_{2e}} \right)^{ZFS} = \Delta^2 \tau_v \left( \frac{5.26}{1 + 0.372\omega_S^2 \tau_v^2} + \frac{7.18}{1 + 1.24\omega_S \tau_v} \right) \quad [7]$$

$$\tau_v = \tau_v^{298} \exp \left\{ \frac{E_v}{R} \left( \frac{1}{T} - \frac{1}{298.15} \right) \right\} \quad [8]$$

The outer-sphere contribution can be described by Eq. 5 where NA is the Avogadro constant, and  $J_{os}$  is its associated spectral density function.<sup>3,4</sup>

$$r_{1os} = \frac{32N_A \pi}{405} \left( \frac{\mu_0}{4\pi} \right)^2 \frac{\hbar^2 \gamma_S^2 \gamma_I^2}{\alpha_{GdH} D_{GdH}} S(S+1) [3J_{os}(\omega_I, T_{1e}) + 7J_{os}(\omega_S, T_{2e})] \quad [9]$$

$$J_{os}(\omega, T_{je}) = \text{Re} \left[ \frac{1 + \frac{1}{4} \left( i\omega\tau_{GdH} + \frac{\tau_{GdH}}{T_{je}} \right)^{1/2}}{1 + \left( i\omega\tau_{GdH} + \frac{\tau_{GdH}}{T_{je}} \right)^{1/2} + \frac{4}{9} \left( i\omega\tau_{GdH} + \frac{\tau_{GdH}}{T_{je}} \right) + \frac{1}{9} \left( i\omega\tau_{GdH} + \frac{\tau_{GdH}}{T_{je}} \right)^{3/2}} \right] \quad j = 1, 2 \quad [10]$$

The diffusion coefficient for the diffusion of a water proton away from a  $Gd^{III}$  complex,  $D_{GdH}$ , is assumed to obey an exponential law versus the inverse of the temperature, with an activation energy  $E_{GdH}$ , as given in Eq. 11  $D_{GdH}^{298}$  is the diffusion coefficient at 298.15 K.

$$D_{\text{GdH}} = D_{\text{GdH}}^{298} \exp \left\{ \frac{E_{\text{GdH}}}{R} \left( \frac{1}{298.15} - \frac{1}{T} \right) \right\} \quad [11]$$

## References

- 1 A. Beeby, I. M. Clarkson, R. S. Dickins, S. Faulkner, D. Parker, L. Royle, A. S. de Sousa, J. A. G. Williams and M. Woods, *J. Chem. Soc. Perkin Trans. 2*, 1999, 493–504.
- 2 Z. Luz and S. Meiboom, *J. Chem. Phys.*, 1964, **40**, 2686–2692.
- 3 J. H. Freed, *J. Chem. Phys.*, 1978, **68**, 4034–4037.
- 4 S. H. Koenig and R. D. Brown, *Prog. Nucl. Magn. Reson. Spectrosc.*, 1990, **22**, 487–567.
